# Supplementary material for: Novel star-shaped D–π–D–π–D and (D–π)2–D–(π–D)2 anthracene-based hole transporting materials for perovskite solar cells
Source: Royal Society of Chemistry journal article supplement (doi:10.1039/d0na00299b), 2020-01-01
Supplement: d0na00299b1.pdf [file d0na00299b1.pdf]

## Supporting Information

### **Novel star shaped D- $\pi$ -D- $\pi$ -D and (D- $\pi$ )<sub>2</sub>-D-( $\pi$ -D)<sub>2</sub>, anthracene-based hole transporting material for perovskite solar cells**

Muniyasamy Harikrishnan, Sepperumal Murugesan, Ayyanar Siva\*

Supramolecular and Organometallic Chemistry Lab, Department of Inorganic Chemistry, School of Chemistry, Madurai Kamaraj University Madurai-21.

Corresponding author Email (drasiva@gmail.com and siva.chem@mkuniversity.org)

| <b>S.No</b> | <b>Content</b>                                                                                | <b>Page No.</b> |
|-------------|-----------------------------------------------------------------------------------------------|-----------------|
| <b>1.</b>   | <b><sup>1</sup>H and <sup>13</sup>C NMR spectrum of ANTTPA (Figure S1 &amp; S2)</b>           | <b>2</b>        |
| <b>2.</b>   | <b><sup>1</sup>H and <sup>13</sup>C NMR spectrum of AOME (Figure S3 &amp; S4)</b>             | <b>3</b>        |
| <b>3.</b>   | <b><sup>1</sup>H and <sup>13</sup>C NMR spectrum of AOHE (Figure S5 &amp; S6)</b>             | <b>4</b>        |
| <b>4.</b>   | <b>Emission spectrum of the synthesized HTMs in both solution and film phases (Figure S7)</b> | <b>5</b>        |
| <b>5.</b>   | <b>Dihedral angle display the ANTTPA HTM (Figure S8)</b>                                      | <b>5</b>        |
| <b>6.</b>   | <b>Dihedral angle display the AOME HTM (Figure S9)</b>                                        | <b>6</b>        |
| <b>7.</b>   | <b>Dihedral angle display the AOHE HTM (Figure S10)</b>                                       | <b>6</b>        |
| <b>8.</b>   | <b>Dimroth–Reichardt solvent polarity correlations for AOME (Figure S11)</b>                  | <b>7</b>        |
| <b>9.</b>   | <b>Dimroth–Reichardt solvent polarity correlations for AOHE (Figure S12)</b>                  | <b>7</b>        |
| <b>10.</b>  | <b>Dimroth–Reichardt solvent polarity correlations for ANTTPA (Figure S13)</b>                | <b>8</b>        |

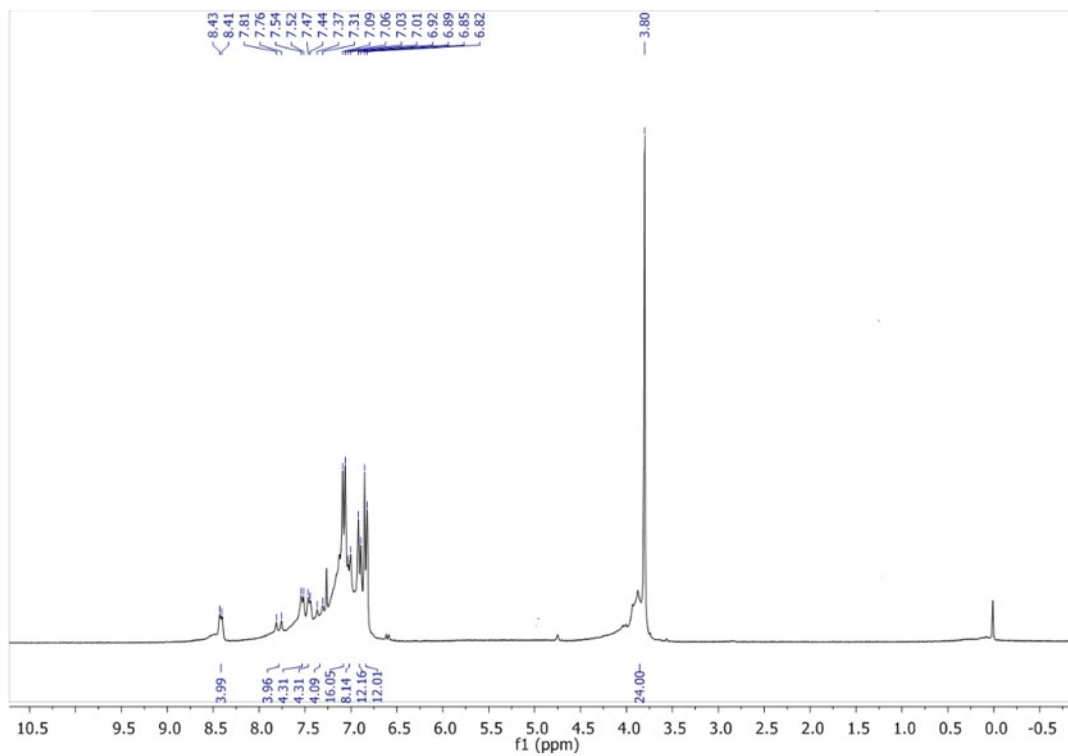

**Figure S1.**  $^1\text{H}$  NMR spectrum of compound ANTPA

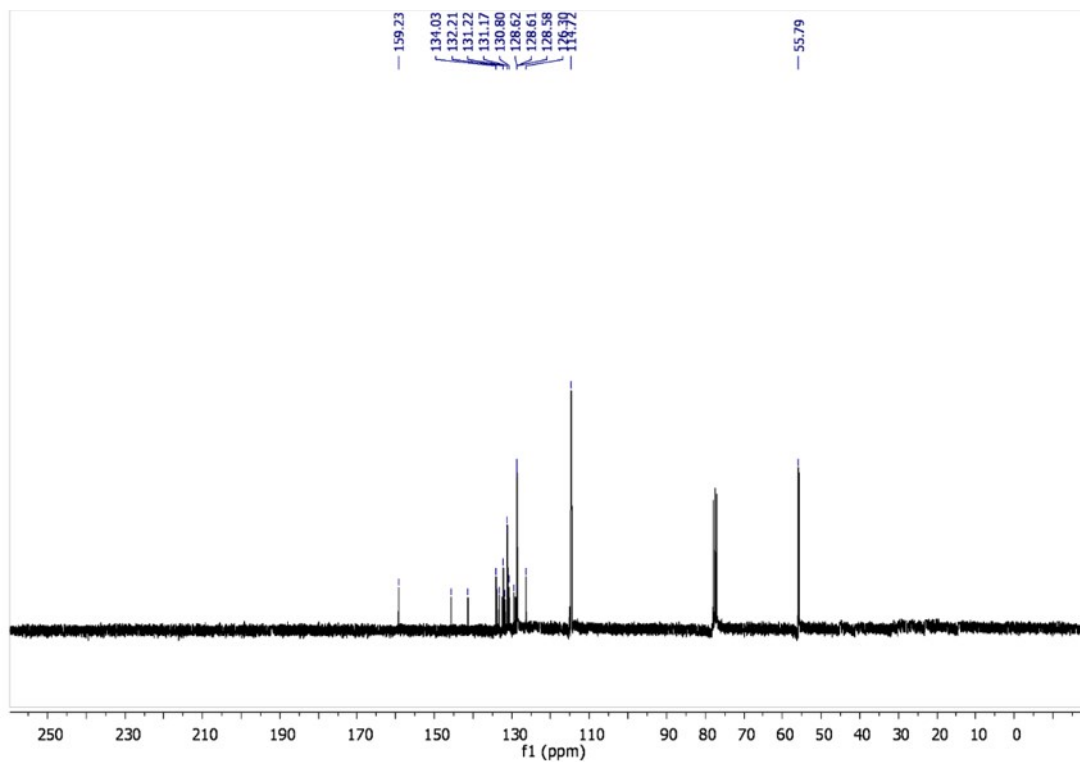

**Figure S2.**  $^{13}\text{C}$  NMR spectrum of compound ANTPA

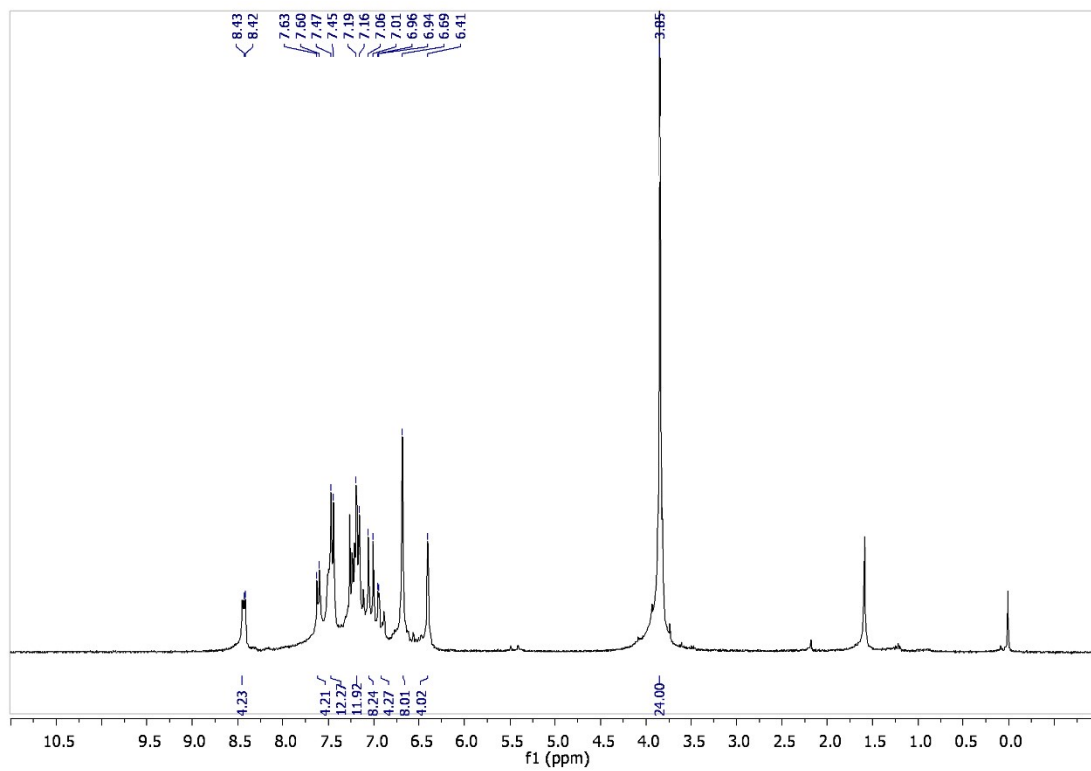

**Figure S3.**  $^1\text{H}$  NMR spectrum of compound AOME

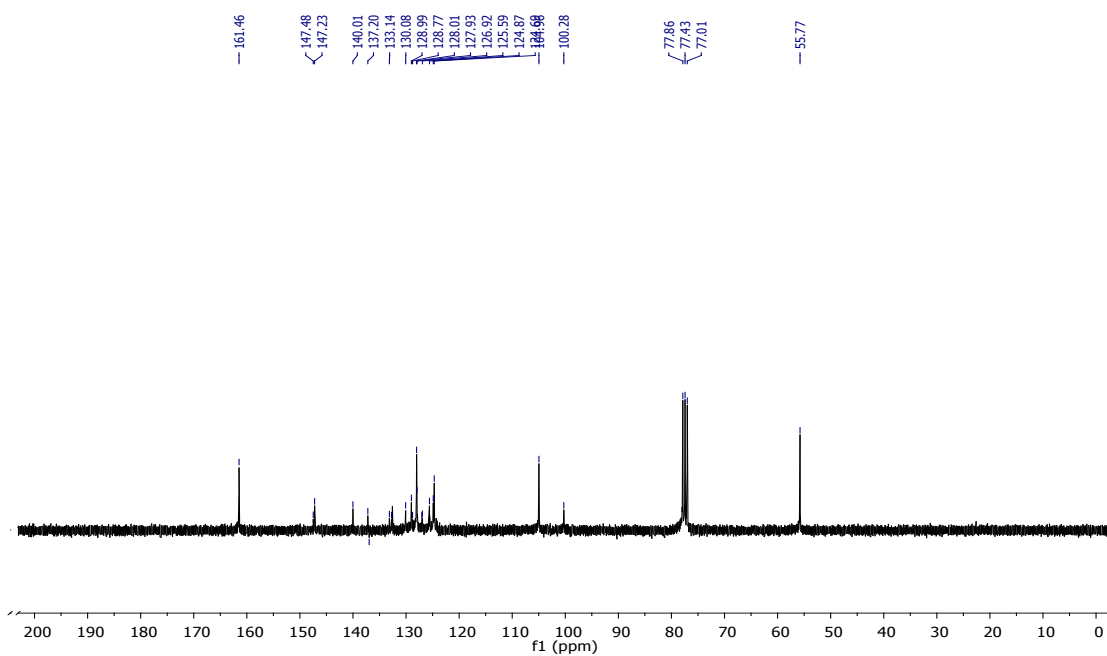

**Figure S4.**  $^{13}\text{C}$  NMR spectrum of compound AOME

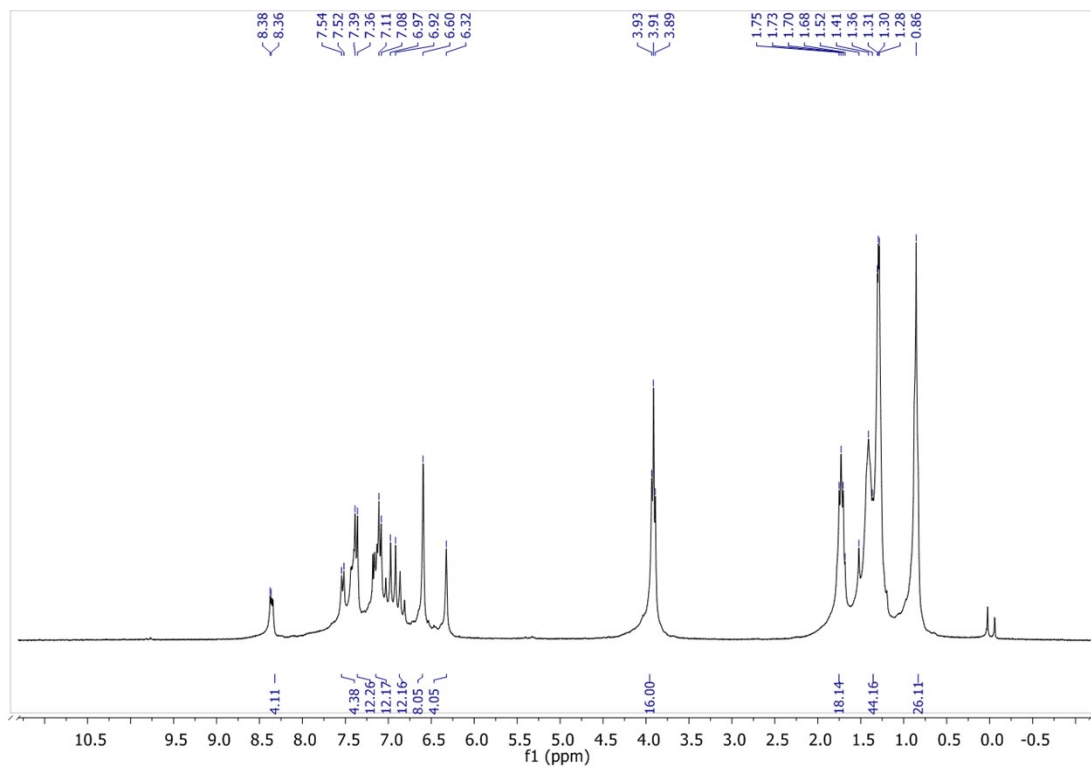

**Figure S5.**  $^1\text{H}$  NMR spectrum of compound AOHE

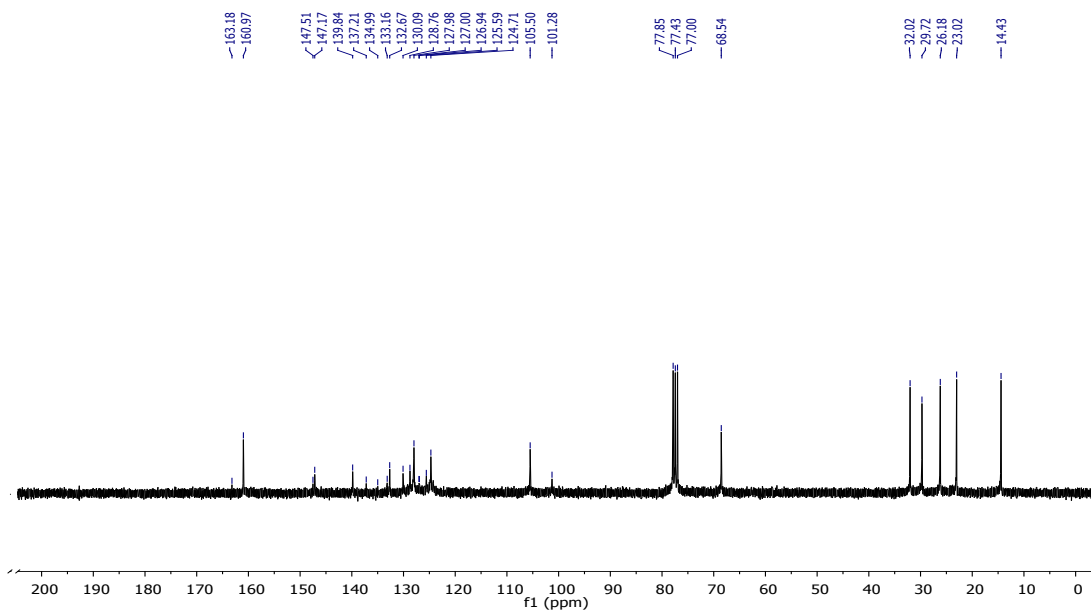

**Figure S6.**  $^{13}\text{C}$  NMR spectrum of compound AOHE

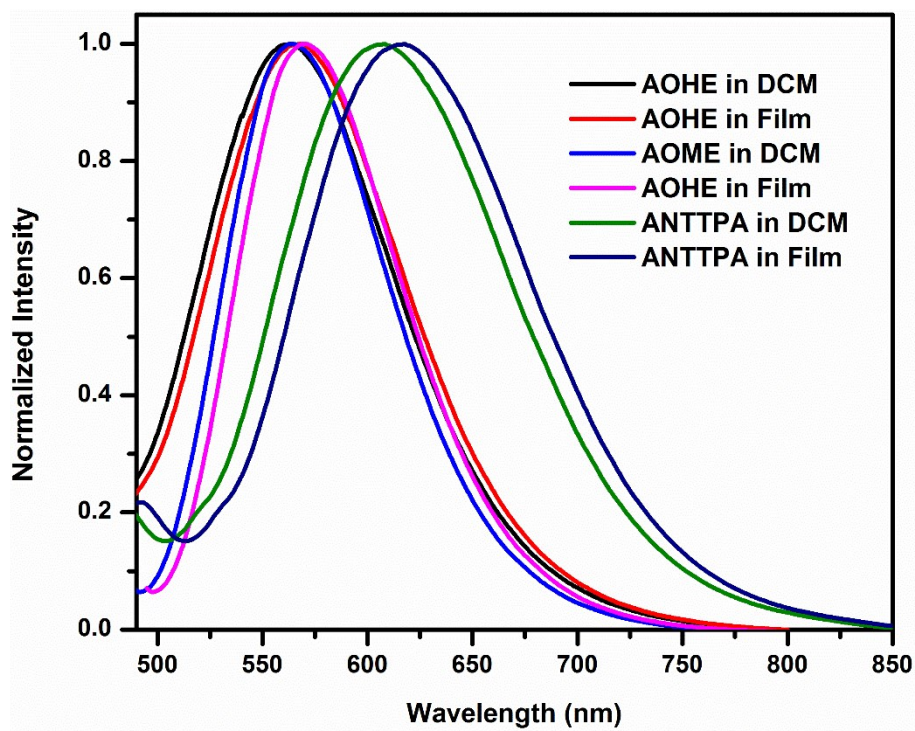

**Figure S7.** Emission spectrum of the synthesized HTMs in both solution and film phases.

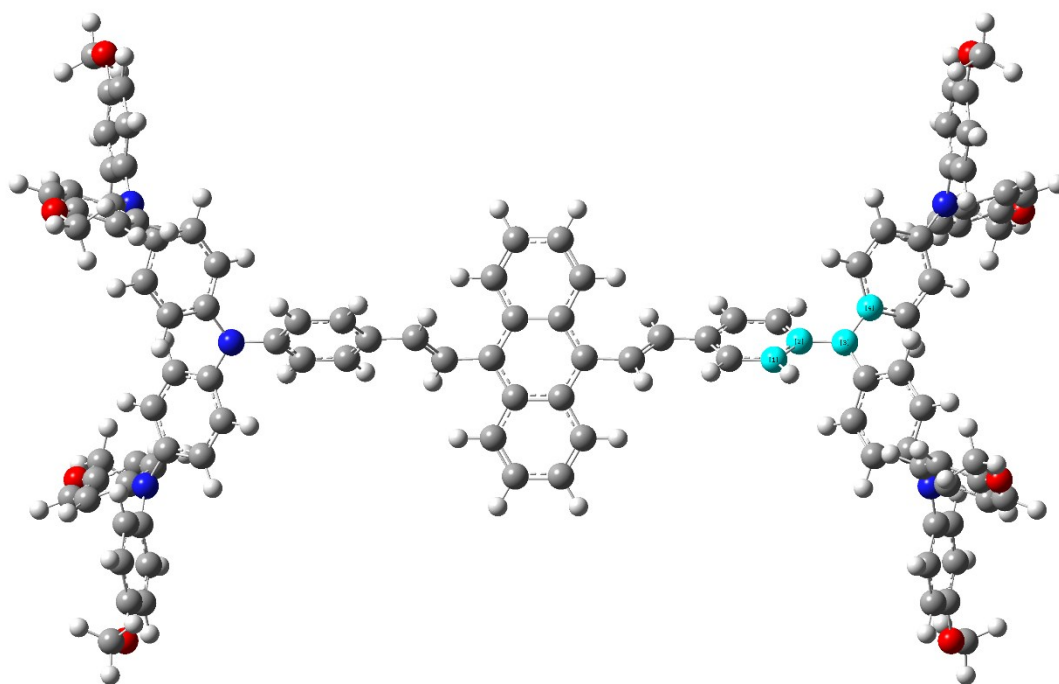

**Figure S8.** Dihedral angle display the ANTPA HTM

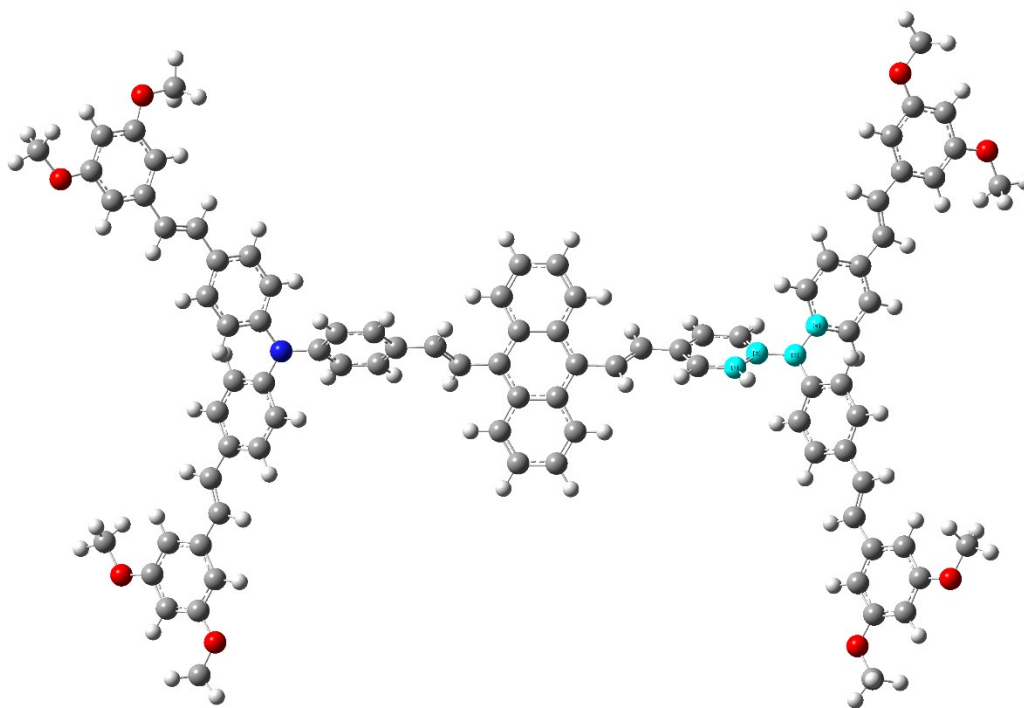

**Figure S9.** Dihedral angle display the AOME HTM

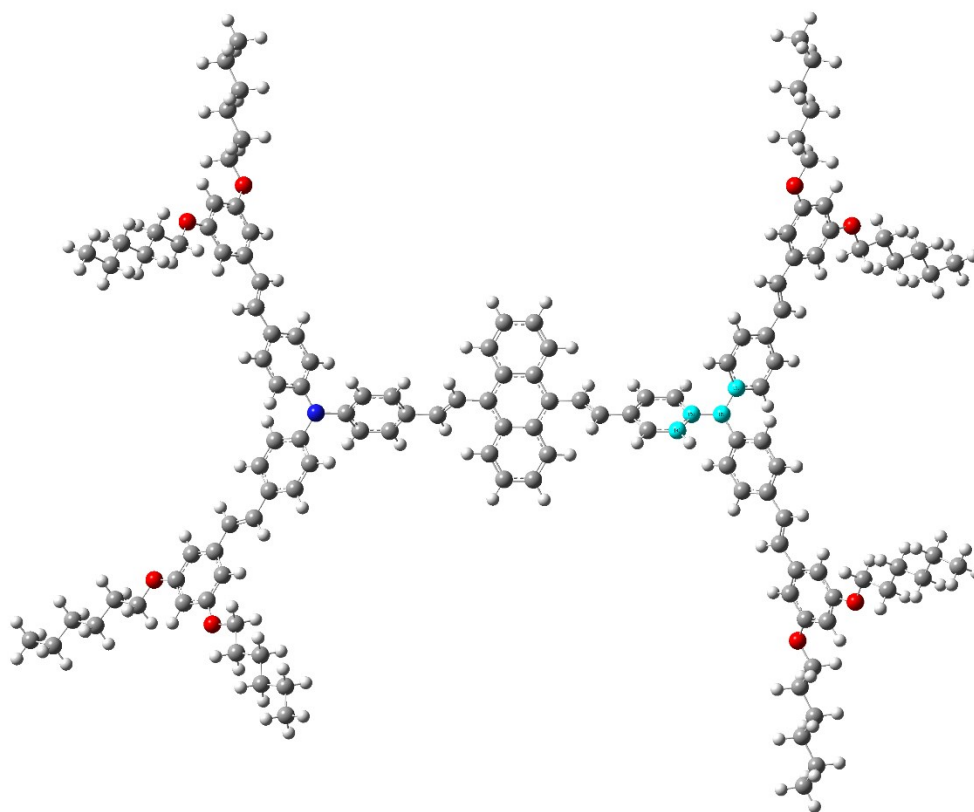

Figure S10. Dihedral angle display the AOHE HTM

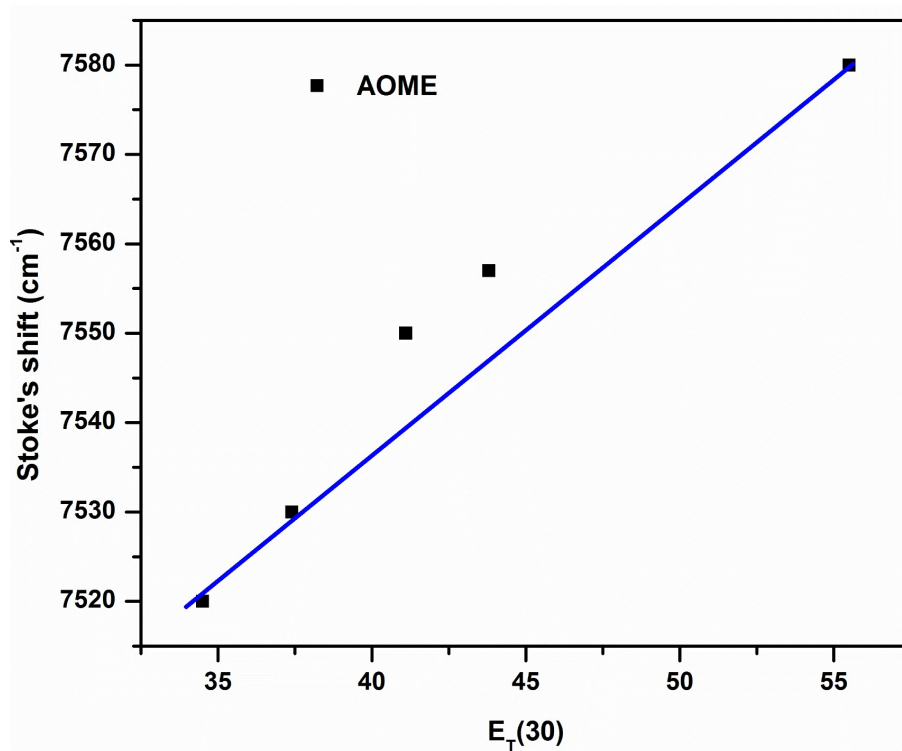

Figure S11. Dimroth–Reichardt solvent polarity correlations for AOME.

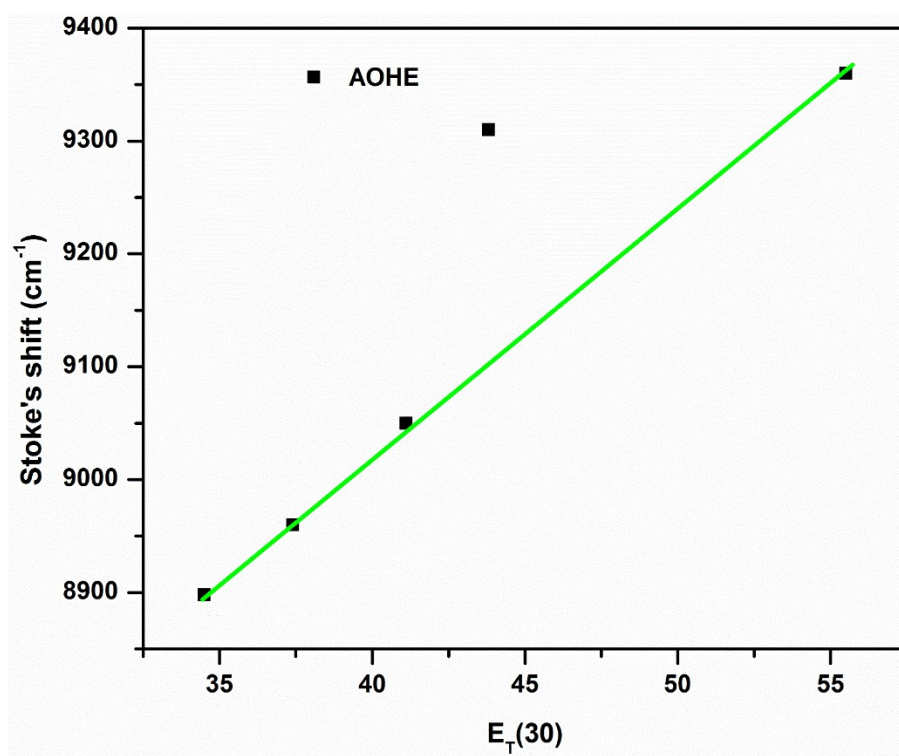

Figure S12. Dimroth–Reichardt solvent polarity correlations for AOHE.



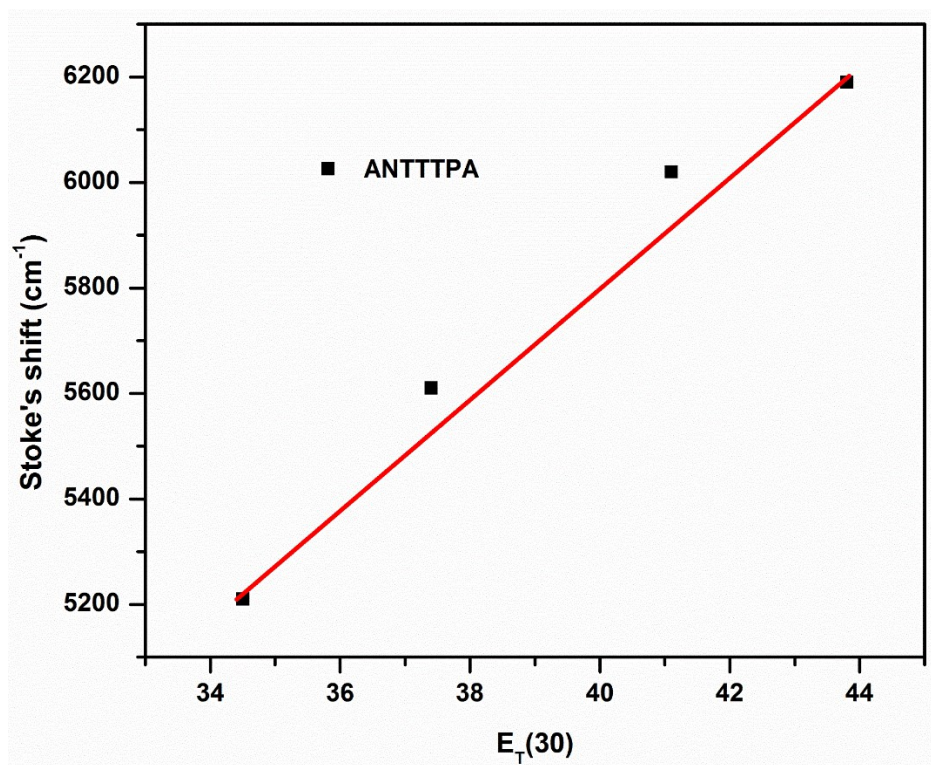

**Figure S13.** Dimroth–Reichardt solvent polarity correlations for ANTTTPA
